# Supplementary material for: Temperature effect on the steric and polar Taft substituent parameter values
Source: Royal Society of Chemistry journal article supplement (doi:10.1039/d3re00500c), 2024-01-01
Supplement: d3re00500c1.pdf [file d3re00500c1.pdf]

## Electronic Supplementary Information

### **Temperature effect on the steric and polar Taft substituent parameter values**

Sindi Baco,<sup>a,b,c</sup> Marcel Klinksiek,<sup>b</sup> Mélanie Mignot,<sup>c</sup> Christoph Held,<sup>b</sup> Julien Legros,<sup>c</sup> and Sébastien Leveneur<sup>a\*</sup>

<sup>a</sup>INSA Rouen Normandie, UNIROUEN, Normandie Univ, LSPC, UR4704, F-76000 Rouen, France, France.

<sup>b</sup>Laboratory of Thermodynamics, Department of Biochemical and Chemical Engineering, TU Dortmund University, Emil-Figge-Str.70, 44227 Dortmund, Germany.

<sup>c</sup> INSA Rouen Normandie, Univ Rouen Normandie, CNRS, Normandie Univ, COBRA UMR 6014, INC3M FR 3038, F-76000 Rouen, France.

## Table of Contents

1. Experimental Section
2. Modeling Section

### 1. Experimental Section

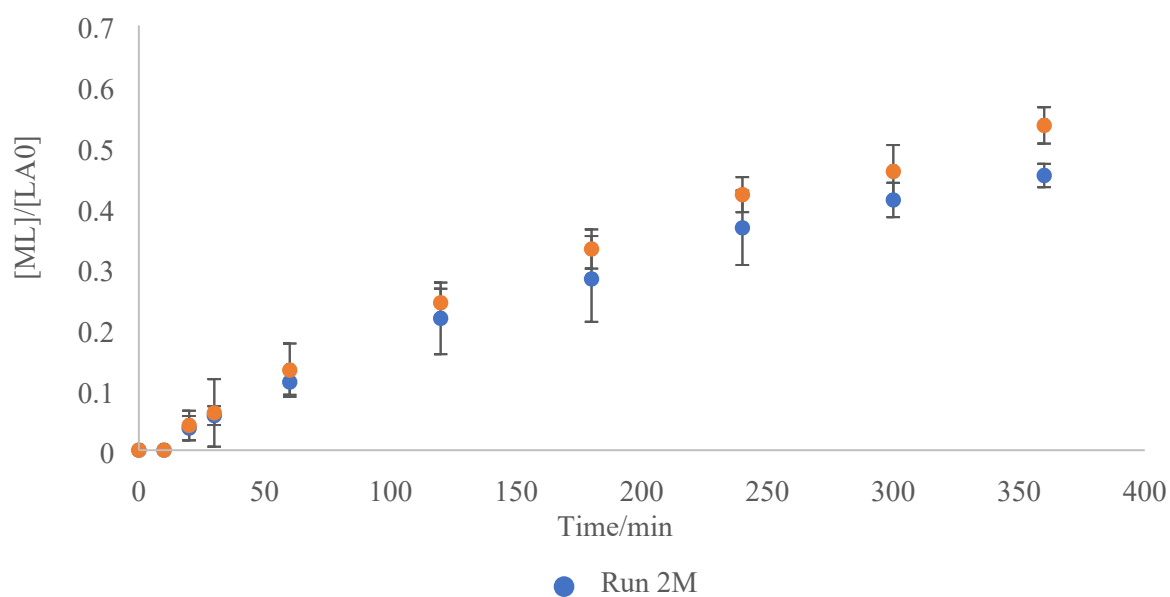

Figure S1. Repeatability of LA esterification with methanol by comparing Run 2M and Run 3M

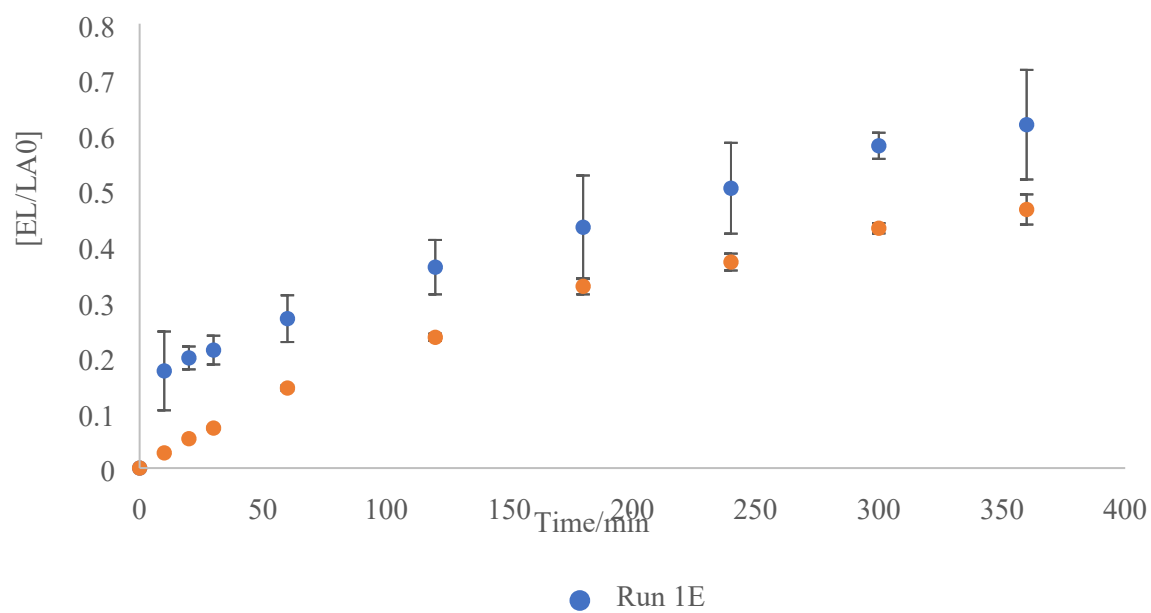

Figure S2. Repeatability of LA esterification with ethanol by comparing Run 1E and Run 11E

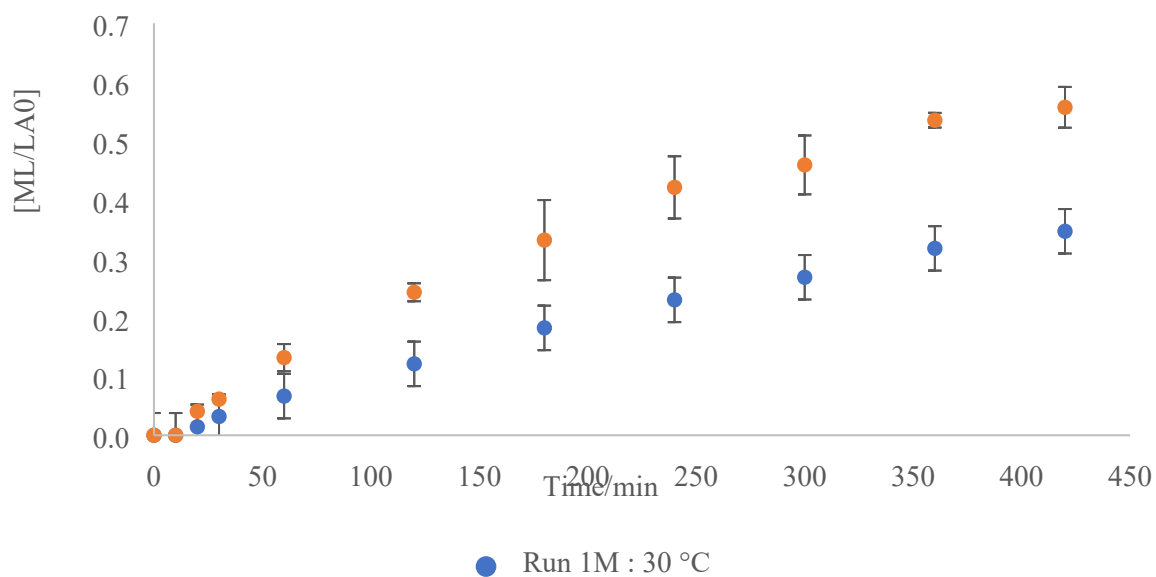

**Figure S3.** Effect of temperature on the kinetics of LA esterification with methanol by comparing Runs 1W and 2W

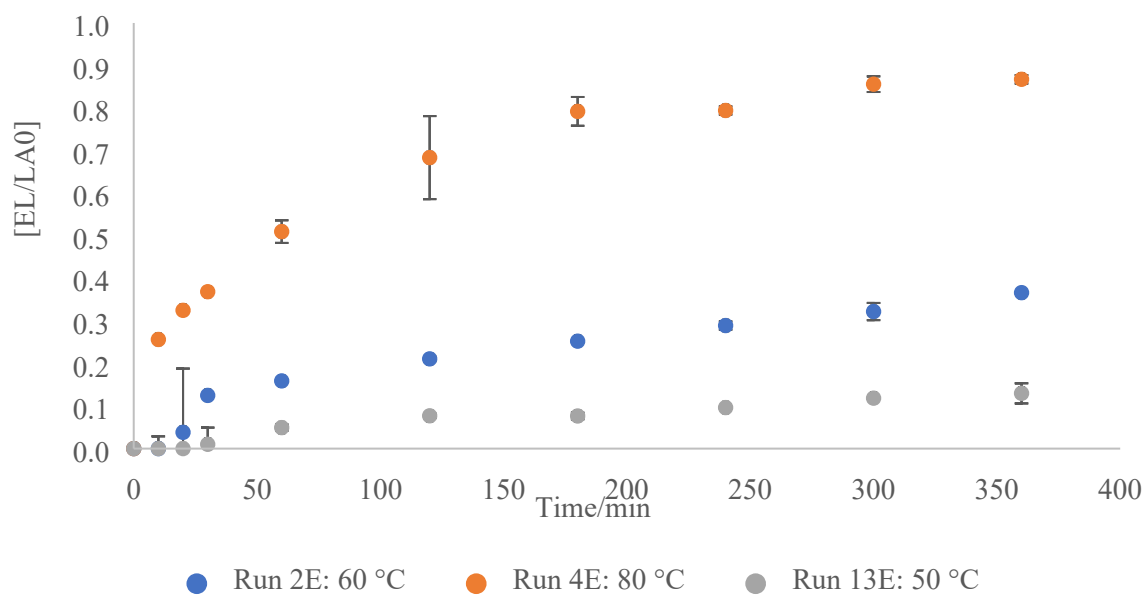

**Figure S4.** Effect of temperature on the kinetics of LA esterification with ethanol by comparing Runs 2E, 4E and 13E

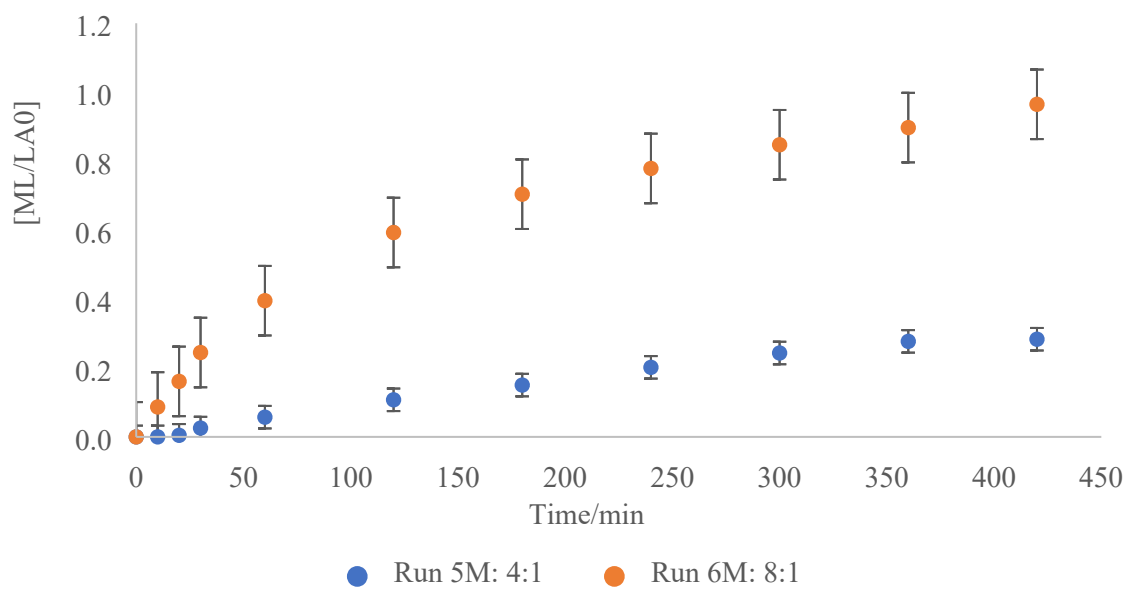

**Figure S5.** Effect of molar ratio on the kinetics of LA esterification with methanol by comparing Run 5M and Run 6M

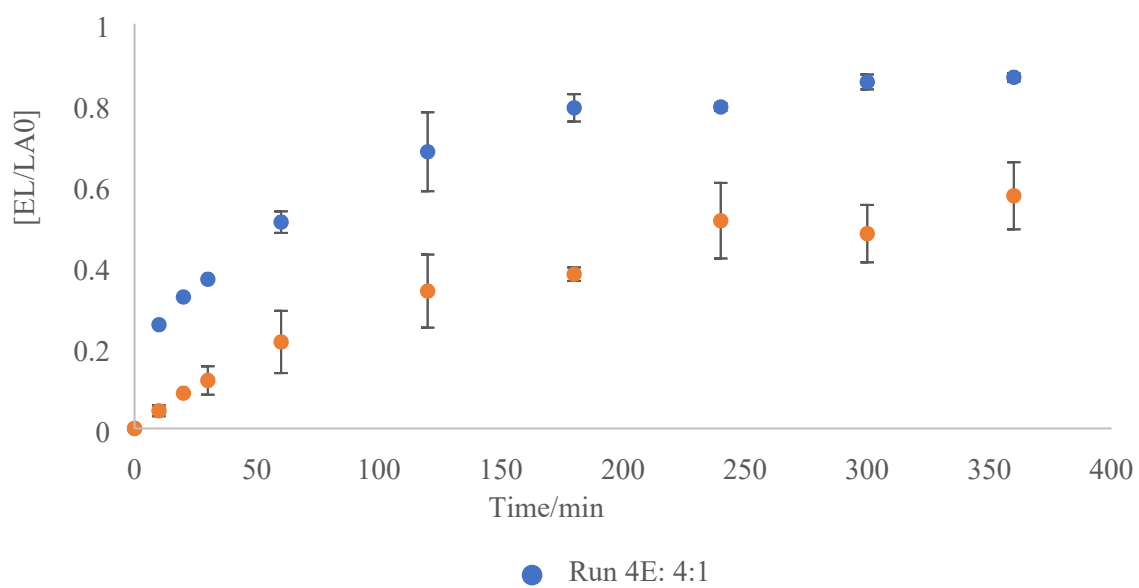

**Figure S6.** Effect of molar ratio on the kinetics of LA esterification with ethanol by comparing Run 4E and Run 7E

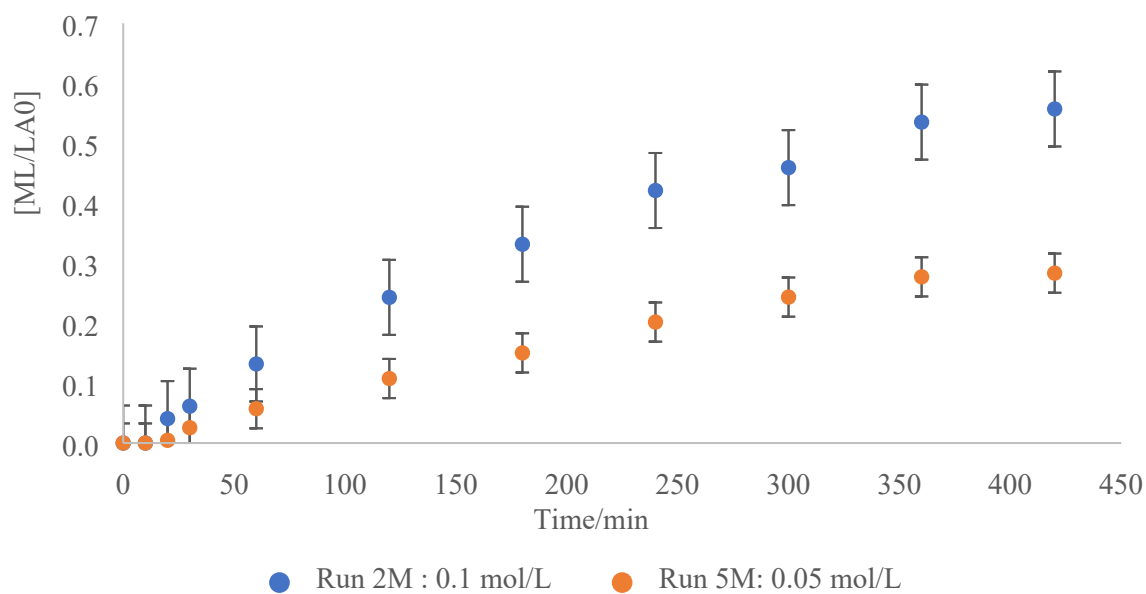

**Figure S7.** Effect of catalyst on the kinetics of LA esterification with methanol by comparing Run 2M and Run 5M

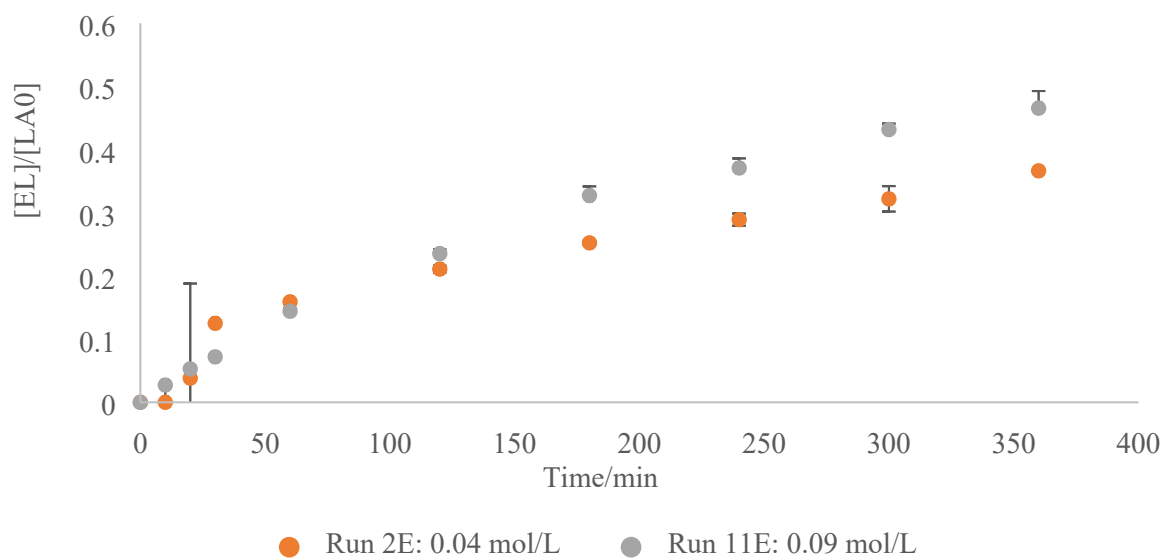

**Figure S8.** Effect of catalyst on the kinetics of LA esterification with ethanol by comparing Run 2E and Run 11E

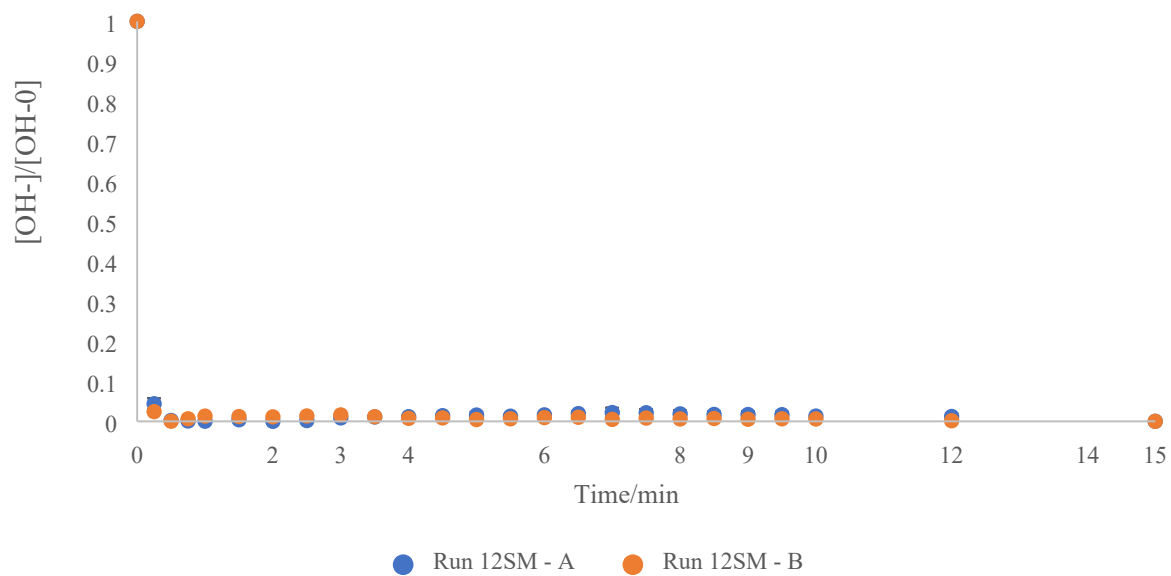

**Figure S9.** Repeatability of ML saponification by comparing Run 12SM - A and Run 12M - B

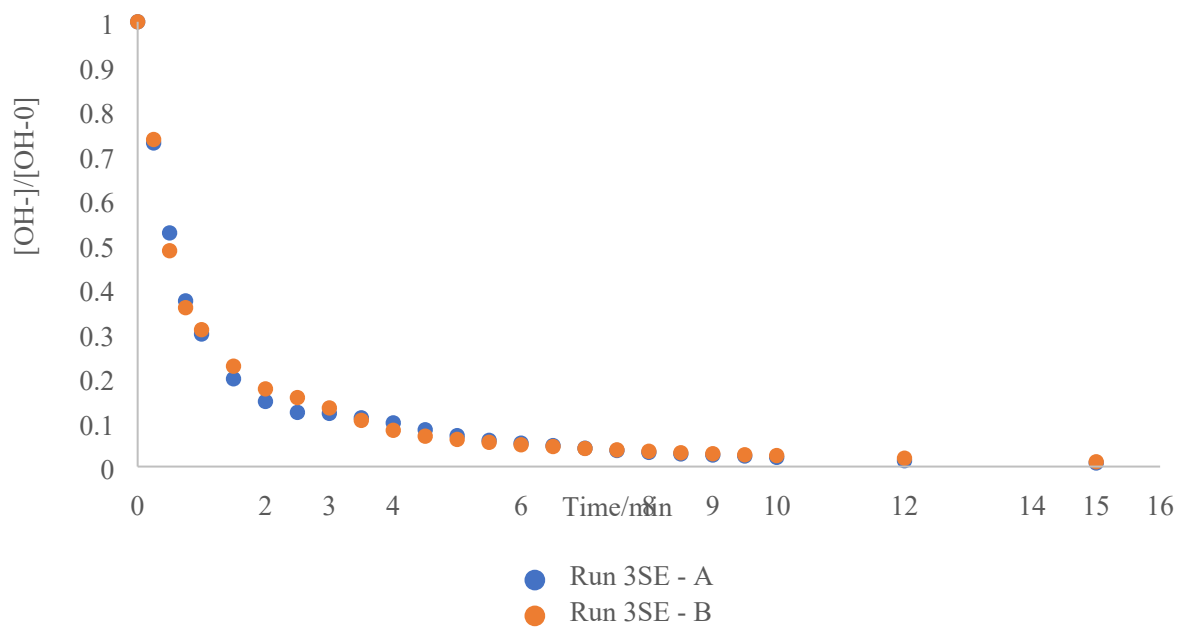

**Figure S10.** Repeatability of EL saponification by comparing Run 3SE - A and Run 3SE - B

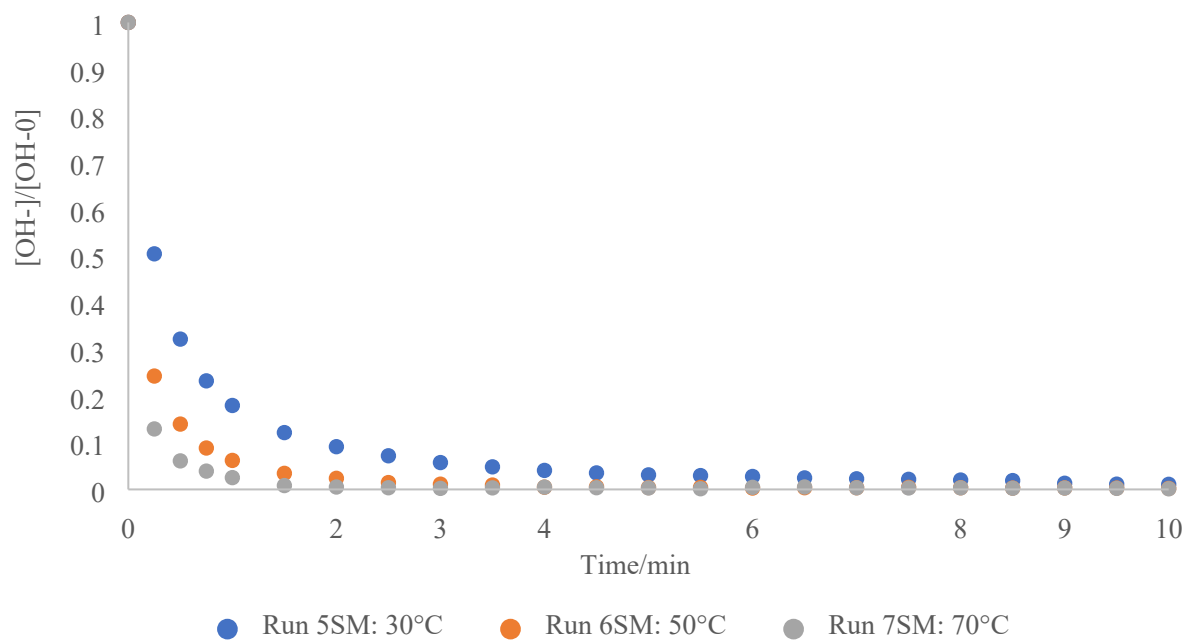

**Figure S11.** Effect of temperature on the kinetics of ML saponification by comparing Runs 5SM, 6SM and 7SM

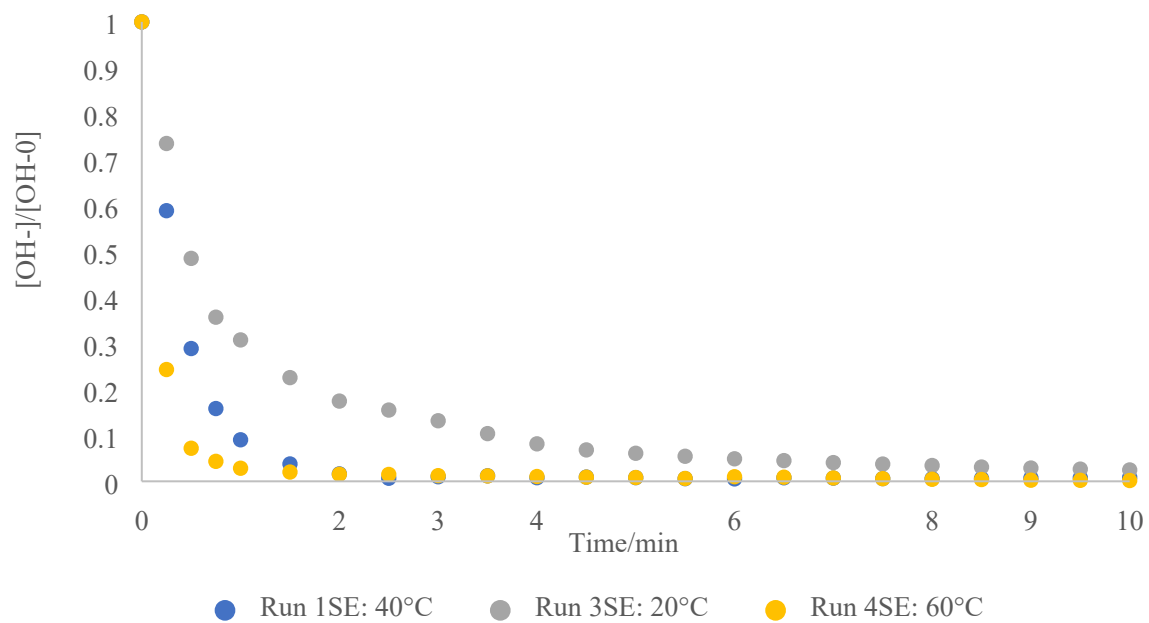

**Figure S12.** Effect of temperature on the kinetics of EL saponification by comparing Runs 1SE, 3SE and 4SE

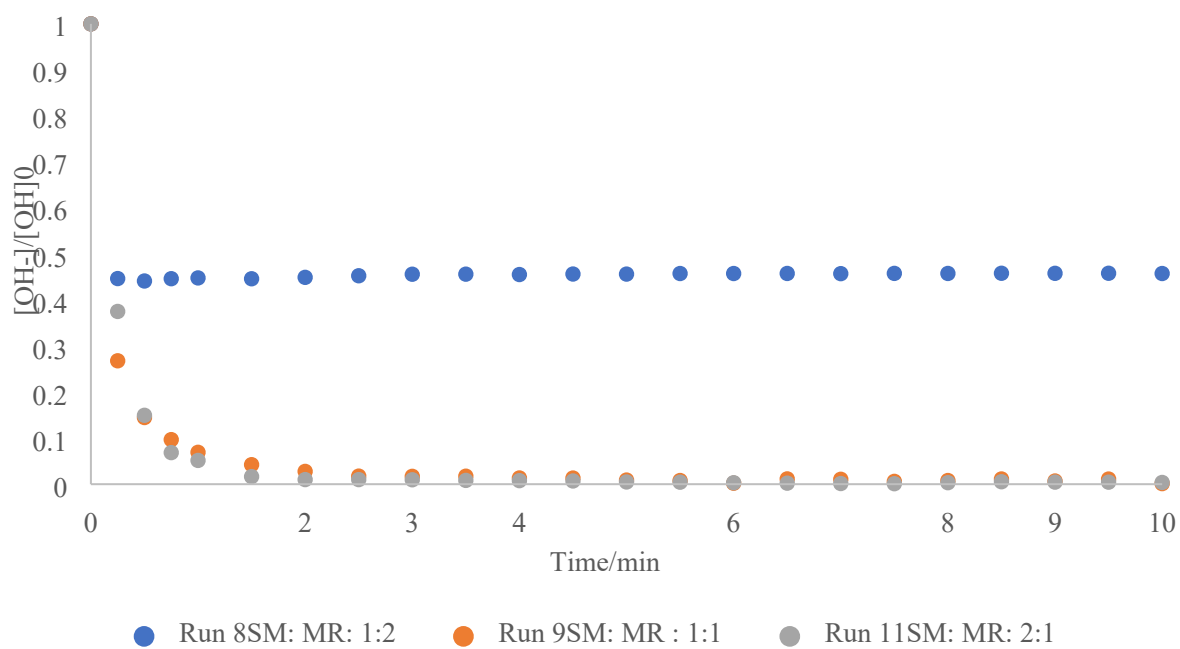

**Figure S13:** Effect of molar ratio on the kinetics of ML saponification by comparing Runs 8SM, 9SM and 11SM

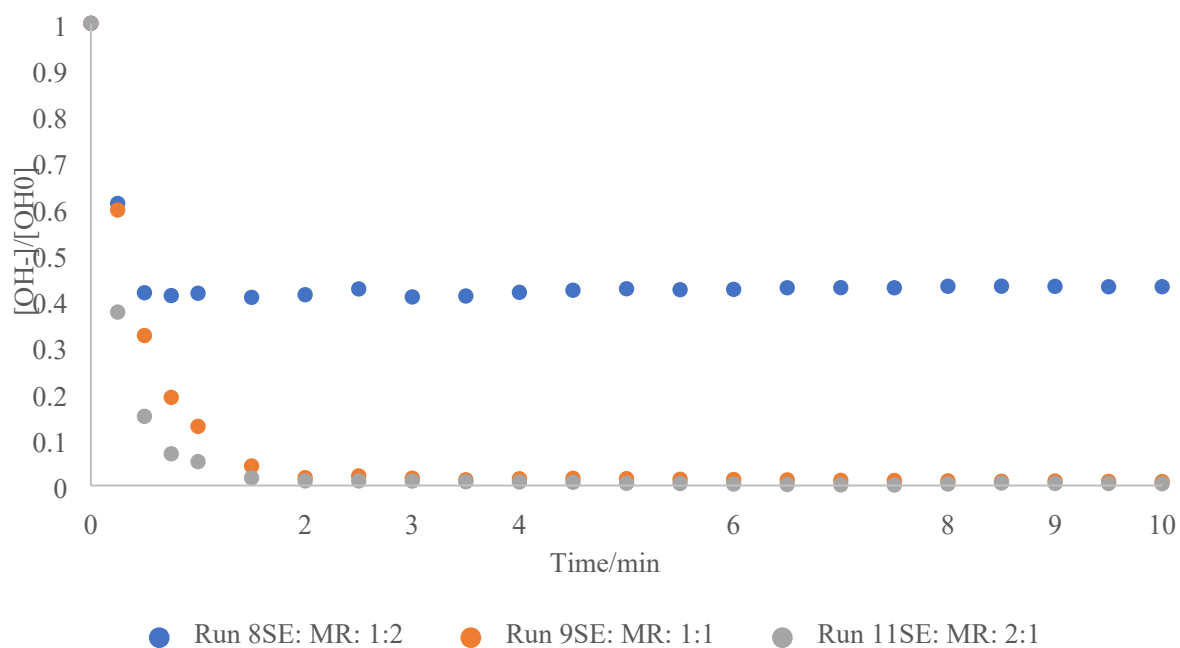

**Figure S14:** Effect of molar ratio on the kinetics of EL saponification by comparing Runs 8SE, 9SE and 11SE



## 2. Modeling Section

Material balances for the esterification system are

$$\frac{d[LA]}{dt} = -r_{esterification}^W$$

$$\frac{d[ROH]}{dt} = -r_{esterification}^W$$

$$\frac{d[RL]}{dt} = r_{esterification}^W$$

$$\frac{d[W]}{dt} = r_{esterification}^W$$

Material balances for the saponification system are

$$\frac{d[RL]}{dt} = -r_{saponification}^W$$

$$\frac{d[NaOH]}{dt} = -r_{saponification}^W$$

$$\frac{d[LA^-]}{dt} = r_{saponification}^W$$

$$\frac{d[ROH]}{dt} = r_{saponification}^W$$

**Table S1.** Dissociation constant values for sulfuric and levulinic acids in water solvent

|                                                                          | Value                             | Unit |
|--------------------------------------------------------------------------|-----------------------------------|------|
| K <sub>I</sub> (first dissociation of H <sub>2</sub> SO <sub>4</sub> )   | Infinity                          | -    |
| K <sub>II</sub> (second dissociation of H <sub>2</sub> SO <sub>4</sub> ) | $\frac{0.011}{55.5}$              | -    |
| K <sub>III</sub> (dissociation of LA)                                    | $\frac{2.57 \cdot 10^{-5}}{55.5}$ | -    |

|                                        |                       |                                 |                       |                                        |
|----------------------------------------|-----------------------|---------------------------------|-----------------------|----------------------------------------|
|                                        | $\ln(k_c^W(T_{ref}))$ | $\frac{E_a^W}{R \cdot T_{ref}}$ | $\ln(K_c^W(T_{ref}))$ | $\frac{\Delta H_r^W}{R \cdot T_{ref}}$ |
| $\ln(k_c^W(T_{ref}))$                  | 1                     |                                 |                       |                                        |
| $\frac{E_a^W}{R \cdot T_{ref}}$        | -0.521                | 1                               |                       |                                        |
| $\ln(K_c^W(T_{ref}))$                  | -0.757                | 0.457                           | 1                     |                                        |
| $\frac{\Delta H_r^W}{R \cdot T_{ref}}$ | 0.449                 | -0.751                          | -0.51                 | 1                                      |

**Table S2.** Normalized covariance matrix of the estimated constants for ML synthesis

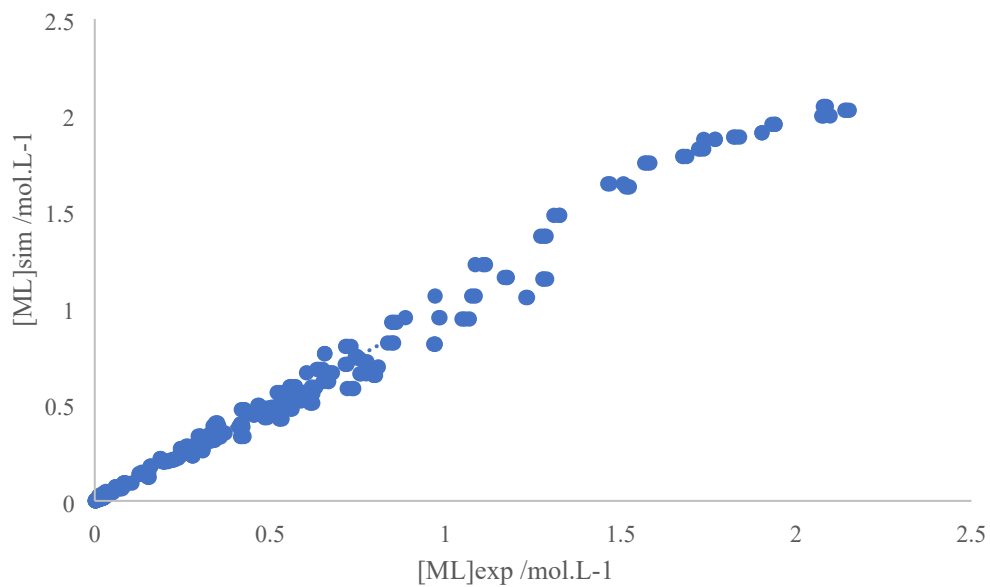

|                                        | $\ln(k_c^W(T_{ref}))$ | $\frac{E_a^W}{R \cdot T_{ref}}$ | $\ln(K_c^W(T_{ref}))$ | $\frac{\Delta H_r^W}{R \cdot T_{ref}}$ |
|----------------------------------------|-----------------------|---------------------------------|-----------------------|----------------------------------------|
| $\ln(k_c^W(T_{ref}))$                  | 1                     |                                 |                       |                                        |
| $\frac{E_a^W}{R \cdot T_{ref}}$        | -0.506                | 1                               |                       |                                        |
| $\ln(K_c^W(T_{ref}))$                  | -0.707                | 0.367                           | 1                     |                                        |
| $\frac{\Delta H_r^W}{R \cdot T_{ref}}$ | 0.401                 | -0.776                          | -0.278                | 1                                      |

**Figure S15.** Parity plot for the synthesis of ML.

**Table S3.** Normalized covariance matrix of the estimated constants for EL synthesis

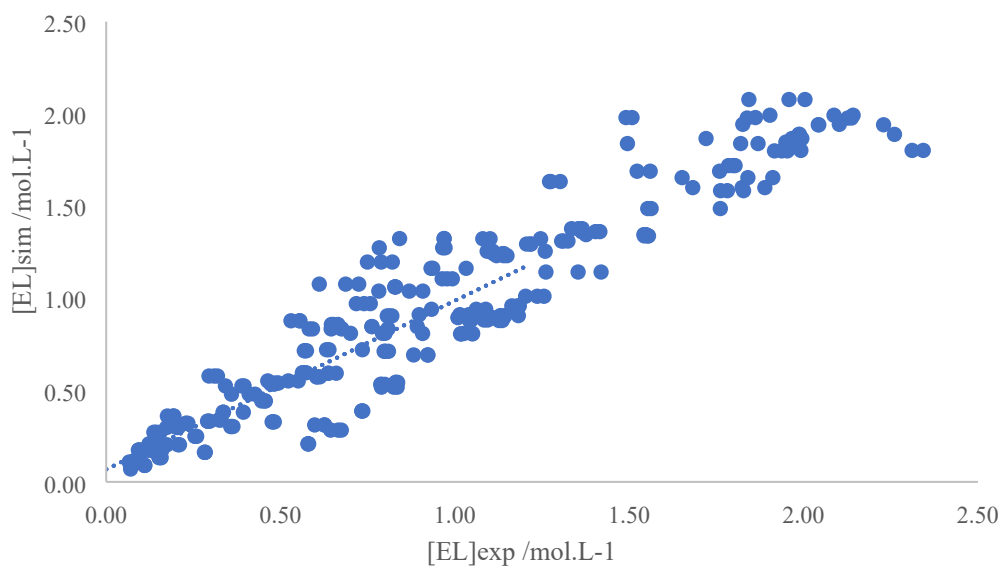

**Figure S16.** Parity plot for the synthesis of EL

**Table S4.** Normalized covariance matrix of the estimated constants for ML saponification

|                                 |                       |                                 |
|---------------------------------|-----------------------|---------------------------------|
|                                 | $\ln(k_c^W(T_{ref}))$ | $\frac{E_a^W}{R \cdot T_{ref}}$ |
| $\ln(k_c^W(T_{ref}))$           | 1                     |                                 |
| $\frac{E_a^W}{R \cdot T_{ref}}$ | 0.795                 | 1                               |

**Table S5.** Normalized covariance matrix of the estimated constants for EL saponification

|                                 |                       |                                 |
|---------------------------------|-----------------------|---------------------------------|
|                                 | $\ln(k_c^W(T_{ref}))$ | $\frac{E_a^W}{R \cdot T_{ref}}$ |
| $\ln(k_c^W(T_{ref}))$           | 1                     |                                 |
| $\frac{E_a^W}{R \cdot T_{ref}}$ | 0.633                 | 1                               |

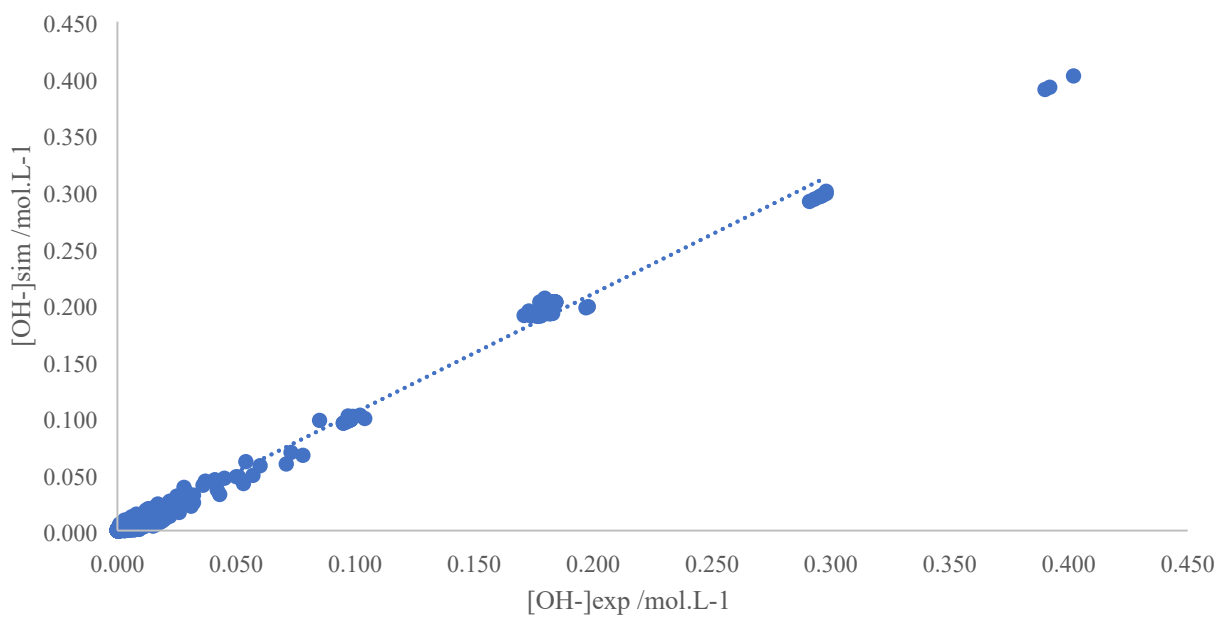

**Figure S17.** Parity plot for the ML saponification.

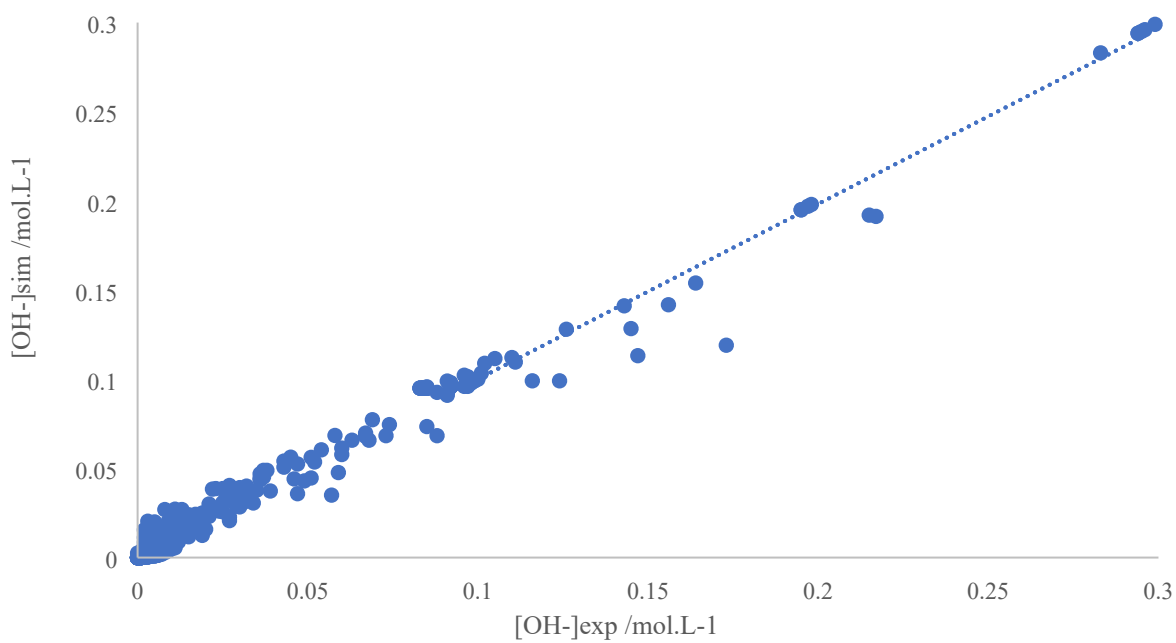

**Figure S18.** Parity plot for EL saponification.

**Table S6.** Taft polar ( $\sigma^*$ ) and steric ( $E_s$ ) substituent values for MeOH and EtOH with temperature.

| Temperature/°C | $E_s$    | $\sigma^*$ |
|----------------|----------|------------|
| 20             | -0.05682 | -0.20347   |
| 25             | -0.06937 | -0.19695   |
| 30             | -0.0815  | -0.19064   |
| 35             | -0.09323 | -0.18454   |
| 40             | -0.1046  | -0.17863   |
| 45             | -0.1156  | -0.17291   |
| 50             | -0.12627 | -0.16737   |
